# Supplementary material
Source: PubMed Central journal article supplement (PMC6827875)
Supplement: NIHMS1540795-supplement-12671_2019_1201_MOESM1_ESM.pdf [file NIHMS1540795-supplement-12671_2019_1201_MOESM1_ESM.pdf]

| Cluster Index | Voxels | P        | -log10(P) | Z-MAX | Z-MAX X (mm) | Z-MAX Y (mm) | Z-MAX Z (mm) | Z-COG X (mm) | Z-COG Y (mm) | Z-COG Z (mm) | COPE-MAX | COPE-MAX X (mm) | COPE-MAX Y (mm) | COPE-MAX Z (mm) | COPE-MEAN |
|---------------|--------|----------|-----------|-------|--------------|--------------|--------------|--------------|--------------|--------------|----------|-----------------|-----------------|-----------------|-----------|
| 17            | 1183   | 5.21e-11 | 10.3      | 4.73  | -36          | 44           | 44           | -16.3        | 30.7         | 52.8         | 240      | -2              | 14              | 64              | 118       |
| 16            | 987    | 1.46e-09 | 8.84      | 4.58  | 24           | -84          | -14          | 33.5         | -77.8        | -15.8        | 184      | 32              | -86             | -24             | 90.8      |
| 15            | 769    | 5.96e-08 | 7.22      | 4.72  | 26           | 22           | 66           | 24.8         | 24           | 58.7         | 166      | 24              | 20              | 64              | 86.8      |
| 14            | 654    | 7.15e-07 | 6.15      | 4.75  | -26          | -10          | 52           | -22.3        | -15.9        | 59           | 189      | -26             | -18             | 72              | 72.5      |
| 13            | 534    | 8.94e-06 | 5.05      | 5.06  | -38          | -34          | 48           | -36.9        | -32.6        | 42.1         | 116      | -38             | -34             | 48              | 60.9      |
| 12            | 367    | 0.000405 | 3.39      | 4.17  | -38          | -88          | -6           | -34.8        | -87.7        | -15.9        | 192      | -34             | -86             | -28             | 110       |
| 11            | 359    | 0.000492 | 3.31      | 4.49  | -12          | 42           | 0            | -26.2        | 41.6         | -0.177       | 126      | -48             | 40              | -2              | 63.4      |
| 10            | 358    | 0.000504 | 3.3       | 3.77  | -46          | -4           | 28           | -44.6        | -9.33        | 33.6         | 97.3     | -46             | -8              | 32              | 67        |
| 9             | 323    | 0.00121  | 2.92      | 5.93  | 18           | -26          | 80           | 14.9         | -25.9        | 71.7         | 239      | 16              | -22             | 74              | 124       |
| 8             | 320    | 0.00131  | 2.88      | 3.79  | -48          | -56          | -4           | -40.7        | -52.2        | -2.14        | 96.6     | -50             | -56             | -4              | 54.6      |
| 7             | 303    | 0.00202  | 2.69      | 4.46  | -50          | 48           | 18           | -45.3        | 43.8         | 16           | 217      | -38             | 50              | 20              | 113       |
| 6             | 296    | 0.00243  | 2.62      | 5     | -30          | 22           | 48           | -32.2        | 13           | 53           | 150      | -32             | 4               | 66              | 81.6      |
| 5             | 263    | 0.00585  | 2.23      | 3.71  | 18           | 44           | 6            | 27.2         | 43.8         | 3.1          | 142      | 52              | 38              | 14              | 63.1      |
| 4             | 254    | 0.00747  | 2.13      | 3.84  | 30           | 4            | 36           | 34.7         | -5.55        | 31.8         | 84.4     | 18              | 8               | 22              | 53.9      |
| 3             | 228    | 0.0154   | 1.81      | 5.57  | 8            | 38           | 40           | 7.46         | 36.1         | 41.5         | 186      | 8               | 38              | 40              | 113       |
| 2             | 214    | 0.023    | 1.64      | 3.79  | 20           | -40          | 20           | 17.4         | -40.2        | 21.4         | 73.7     | 4               | -32             | 22              | 48.6      |
| 1             | 208    | 0.0274   | 1.56      | 3.49  | -22          | -44          | 20           | -16.3        | -42          | 15.8         | 85.7     | -4              | -38             | 20              | 50.1      |
